# Supplementary material
Source: HighWire-hosted journal article supplement (http://erj.ersjournals.com/highwire/filestream/112804/field_highwire_adjunct_files/0/CME_31-4.pdf)
Supplement: CME_31-4.pdf [file CME_31-4.pdf]

# CME Exam and Evaluation

## (1 CME credit)

To receive CME credits, read the CME article in this issue, indicate the correct responses and complete the requested information below. The form is also available in electronic format at <http://www.erj.ersjournals.com/current.shtml>. To return the form, you can either:

- ▶ use this form and return it completed to ERSJ Ltd, 442 Glossop Road, Sheffield, S10 2PX, UK.
- ▶ save the electronic form as a Word document and send it by e-mail to [info@ersj.org.uk](mailto:info@ersj.org.uk)

Certificates will be emailed to the address filled in below. Please allow 4 weeks for processing.

### 1. Applicant personal details.

ERS Membership No. (if known): ..... Date of Birth (DD/MM/YYYY): .....

Family Name: ..... First Name: .....

Mailing Address: .....

Postal Code: ..... City: ..... Country: .....

Telephone: + ..... Fax: + .....

E-mail: .....

### 2. Educational questions. Answer by marking the correct answer.

#### 1. Which of the following statements is false?

- There is a need to update spirometric reference values regularly due to birth cohort effects and new technical equipment.
- The ECCS prediction equations were derived from a cohort of healthy, nonsmoking adults in the late 1960s.
- Prediction equations calculated from recent population studies show higher lung volumes than ECCS.
- Spirometric reference values for elderly subjects are often based on extrapolations.

#### 2. Which of the following statements is true?

- Extrapolations are a reliable method of predicting lung volumes of elderly subjects.
- The ECCS prediction equations underestimate the decline of certain lung volumes with age.
- Elderly subjects tend to under-report height and body weight.
- Cognitive deficits do not influence spirometry performance.

#### 3. Which factor has not been shown to be associated with lower lung volumes?

- Obesity.
- Passive smoking.
- Pollution from fossil fuel combustion.
- Caucasian ethnicity.

#### 4. All of the following statements are true, except:

- One acceptable lung function manoeuvre is sufficient to diagnose bronchial obstruction.
- Nose clips or manual occlusion of the nares are generally recommended for lung function testing.
- Stated height or estimating height from arm span can be used in the clinical setting when spirometry is performed in individuals who have conditions that hamper the standing position.
- Using different spirometers may result in systematic deviations of lung function parameters of >5%.
